# Supplementary material
Source: HighWire-hosted journal article supplement (https://bmjopen.bmj.com/content/12/9/e061313)
Supplement: inline-supplementary-material-2 [file inline-supplementary-material-2.pdf]

## Supplements

**Table S1. Search strategy (English).**

|                                                                                                                                                                                                                                                                                                                                                                                                                                                                                                                                                                                                                                                                                                                                                                                                                                                                                                                                                                                                                                                                                                                                                                                                                                                                                                                                                                                                                                                                                                                                                                                                                                                                                                                                                                                                                                                                                                                                                                                                                                                                                                                                                                                                                                                                                                                                                                                                                                                                                                                                                                                                                                                                                                                                                                                                                                                                                                                                                                                                                                                                                                                                                                                                                                                                                                                                                                                                                                                                                                                                                                                                                                                                                                                                                                                                                                                                                                                                                                                                                                                                                                                                                                                                                                                                                                                              |
|------------------------------------------------------------------------------------------------------------------------------------------------------------------------------------------------------------------------------------------------------------------------------------------------------------------------------------------------------------------------------------------------------------------------------------------------------------------------------------------------------------------------------------------------------------------------------------------------------------------------------------------------------------------------------------------------------------------------------------------------------------------------------------------------------------------------------------------------------------------------------------------------------------------------------------------------------------------------------------------------------------------------------------------------------------------------------------------------------------------------------------------------------------------------------------------------------------------------------------------------------------------------------------------------------------------------------------------------------------------------------------------------------------------------------------------------------------------------------------------------------------------------------------------------------------------------------------------------------------------------------------------------------------------------------------------------------------------------------------------------------------------------------------------------------------------------------------------------------------------------------------------------------------------------------------------------------------------------------------------------------------------------------------------------------------------------------------------------------------------------------------------------------------------------------------------------------------------------------------------------------------------------------------------------------------------------------------------------------------------------------------------------------------------------------------------------------------------------------------------------------------------------------------------------------------------------------------------------------------------------------------------------------------------------------------------------------------------------------------------------------------------------------------------------------------------------------------------------------------------------------------------------------------------------------------------------------------------------------------------------------------------------------------------------------------------------------------------------------------------------------------------------------------------------------------------------------------------------------------------------------------------------------------------------------------------------------------------------------------------------------------------------------------------------------------------------------------------------------------------------------------------------------------------------------------------------------------------------------------------------------------------------------------------------------------------------------------------------------------------------------------------------------------------------------------------------------------------------------------------------------------------------------------------------------------------------------------------------------------------------------------------------------------------------------------------------------------------------------------------------------------------------------------------------------------------------------------------------------------------------------------------------------------------------------------------------------|
| <b>Mental health (general)</b>                                                                                                                                                                                                                                                                                                                                                                                                                                                                                                                                                                                                                                                                                                                                                                                                                                                                                                                                                                                                                                                                                                                                                                                                                                                                                                                                                                                                                                                                                                                                                                                                                                                                                                                                                                                                                                                                                                                                                                                                                                                                                                                                                                                                                                                                                                                                                                                                                                                                                                                                                                                                                                                                                                                                                                                                                                                                                                                                                                                                                                                                                                                                                                                                                                                                                                                                                                                                                                                                                                                                                                                                                                                                                                                                                                                                                                                                                                                                                                                                                                                                                                                                                                                                                                                                                               |
| "mental health" OR "mental health issue" OR "mental health needs" OR "mental disorder" OR "mental illness" OR "mental hygiene" OR "intellectual disability" OR "psychological disturbance" OR psychopatholog* OR psychological OR "psychological disability" OR "psycholog* dysfunction" OR "psychiatric illness" OR "psychiatric disorder" OR "cognitive impairment" OR "cognitive health" OR "dual diagnosis" OR "mental health comorbidit**"                                                                                                                                                                                                                                                                                                                                                                                                                                                                                                                                                                                                                                                                                                                                                                                                                                                                                                                                                                                                                                                                                                                                                                                                                                                                                                                                                                                                                                                                                                                                                                                                                                                                                                                                                                                                                                                                                                                                                                                                                                                                                                                                                                                                                                                                                                                                                                                                                                                                                                                                                                                                                                                                                                                                                                                                                                                                                                                                                                                                                                                                                                                                                                                                                                                                                                                                                                                                                                                                                                                                                                                                                                                                                                                                                                                                                                                                              |
| <b>Mental health disorders<sup>a</sup></b>                                                                                                                                                                                                                                                                                                                                                                                                                                                                                                                                                                                                                                                                                                                                                                                                                                                                                                                                                                                                                                                                                                                                                                                                                                                                                                                                                                                                                                                                                                                                                                                                                                                                                                                                                                                                                                                                                                                                                                                                                                                                                                                                                                                                                                                                                                                                                                                                                                                                                                                                                                                                                                                                                                                                                                                                                                                                                                                                                                                                                                                                                                                                                                                                                                                                                                                                                                                                                                                                                                                                                                                                                                                                                                                                                                                                                                                                                                                                                                                                                                                                                                                                                                                                                                                                                   |
| psychosis OR psychotic OR "psychotic disorder" OR "first episode psychosis" OR "depression" OR "major depressive disorder" OR "persistent depressive disorder" OR "depressive symptom" OR "mood disorder" OR "disruptive mood dysregulation disorder" OR "seasonal affective disorder" OR "cyclothymic disorder" OR stress OR "acute stress disorder" OR "stress disorder" OR anxiety OR "anxiety disorder" OR "generalized anxiety disorder" OR hypervigilance OR "social anxiety" OR "separation anxiety" OR "panic disorder" OR phobia* OR "agoraphobia" OR "phobic disorder" OR "self harm" OR suicidal OR "suicidal behavior" OR "suicide attempt" OR "suicidal attempt" OR "suicidal ideation" OR "suicidal thought" OR "self-injury" OR "self-harm" OR "attention deficit hyperactivity disorder" OR adhd OR "attention deficit disorder" OR "bipolar adj1 disorder" OR "manic-depressive" OR "manic state" OR mania* OR "manic disorder" OR "bipolar depression" OR "substance abuse" OR "substance dependence" OR "substance use" OR "substance misuse" OR "chemical substance abuse" OR "psychoactive substance abuse" OR "substance-related disorder" OR "substance-induced disorder" OR "drug addiction" OR "drug abuse" OR "drug use" OR "drug dependence" OR "marijuana" OR "alcohol addiction" OR "alcohol abuse" OR "alcohol use" OR "alcohol dependence" OR "alcohol-related disorder" OR "conduct disorder" OR "conduct problem" OR "behavioral disorder" OR "oppositional adj1 disorder" OR "obsessive compulsive disorder" OR "obsessive compulsive personality" OR "tic disorder" OR "post traumatic adj1 disorder" OR ptsd OR "trauma-related disorder" OR "physical abuse" OR "sexual abuse" OR "emotional abuse" OR "eating disorder" OR anorexia OR "anorexia nervosa" OR bulimia OR "bulimia nervosa" OR "binge-eating disorder" OR "food addiction" OR "autism" OR "asperger's syndrome" OR "autism-spectrum disorder" OR gambling OR "gambling disorder" OR "compulsive gambling" OR "dissociative adj1 disorder" OR "personality disorder" OR "antisocial personality" OR "antisocial adj1 disorder" OR "borderline personality" OR "borderline adj1 disorder" OR "compulsive personality" OR "compulsive adj1 disorder" OR "dependent personality" OR "dependent adj1 disorder" OR "avoidant personality" OR "avoidant adj1 disorder" OR "histrionic personality" OR "histrionic adj1 disorder" OR "passive-aggressive personality" OR "passive-aggressive adj1 disorder" OR paranoia OR "paranoid disorder" OR "paranoid adj1 disorder" OR schizophrenia OR "schizophrenic disorder" OR delirium OR "schizoid personality" OR "schizoid adj1 disorder" OR "schizoaffective disorder" OR "delusion* disorder" OR "reactive attachment disorder" OR apathy OR "premenstrual dysphoric disorder" OR "social isolation" OR "low self-esteem"                                                                                                                                                                                                                                                                                                                                                                                                                                                                                                                                                                                                                                                                                                                                                                                                                                                                                                                                                                                                                                                                                                                                                                                                                                                                                                                                                                                                                                                      |
| <b>Information and communication technologies (ICTs)<sup>b</sup></b>                                                                                                                                                                                                                                                                                                                                                                                                                                                                                                                                                                                                                                                                                                                                                                                                                                                                                                                                                                                                                                                                                                                                                                                                                                                                                                                                                                                                                                                                                                                                                                                                                                                                                                                                                                                                                                                                                                                                                                                                                                                                                                                                                                                                                                                                                                                                                                                                                                                                                                                                                                                                                                                                                                                                                                                                                                                                                                                                                                                                                                                                                                                                                                                                                                                                                                                                                                                                                                                                                                                                                                                                                                                                                                                                                                                                                                                                                                                                                                                                                                                                                                                                                                                                                                                         |
| ehealth, e-health OR "e-mental health" OR "emental health" OR "e-mental health services" OR mhealth OR m-health OR tele* OR telehealth OR TeleHealth OR tele-health* OR "telehealth network" OR "telehealth consultation" OR telepsychiatry OR tele-psychiatry OR teleconferencing OR "tele counselling" OR telecounselling OR "tele-mental health" OR "tele-mental-health" OR telemedicine OR teleconsultation* OR telepsychology OR tele-psychology OR teletherapy OR tele-therapy OR telemedicine OR tele-medicine OR telerehabilitation OR tele-rehabilitation OR phone* OR phone-based OR "phone line" OR telephone* OR "telephone counselling" OR "telephone screening" OR "cell phone" OR cellphone* OR mobile* OR "mobile phone" OR "mobile device" OR "mobile health" OR computer* OR laptop* OR "laptop computer" OR "desktop computer" OR "personal computer" OR "user-computer interface" OR "computer simulation" OR smartphone* OR "smart phone" OR smartwatch* OR "smart watch" OR technolog* OR "technology-based" OR "technology-based service" OR "technology based solution" OR "information technology" OR "communication technology" OR "information and communication technology" OR "health technology" OR "e-health technology" OR "technology-based intervention" OR "communication technology" OR "technological solution" OR "distance technology" OR "emerging technology" OR "evolving technology" OR "social networking technology" OR mobile technolog* OR Online OR "online health" OR "online counselling" OR "online information" OR "online cognitive behavioural therapy" OR "online adj1 support" OR "online training" OR "online program" OR "online option" OR "online deliver" OR "online resource" OR "online gateway" OR "online adj1 hub" OR "online psychotherap*" OR "online platform" OR "online director" OR "online adj2 support" OR "online knowledge exchange" OR "online access point" OR "online adj1 treatment" OR "online tool" OR "online module" OR "online prevention" OR "online application" OR "online chat capability" OR "online experience" OR "online access" OR "online system" OR Line* OR "phone line" OR "distress line" OR "crisis line" OR "crisis helpline" OR "helpline" OR Link OR "electronic link" OR Web OR "websites" OR web-based OR "web resource" OR "mental health website" OR "web browser" OR Virtual OR virtually OR "virtual resource" OR "virtual counselling" OR "virtual solution" OR virtual reality OR "virtual reality exposure therapy" OR VR OR "artificial intelligence" OR Electronic OR electronically OR "electronic link" OR "electronic adj1 record" OR EHR OR "electronic client record" OR "electronic adj1 information and support" OR "electronic case* management" OR electronic-case-management OR electronic-medical-record OR EMR OR "medical record* system" OR "electronic patient" OR electronic-patient* OR e-patient OR "e patient" OR cyber* OR cyber-psychology OR "cyber psychology" OR cyberspace OR cyber-space OR "social media" OR social-media OR "social media communications" OR Facebook OR "social network" OR avatar* OR video* OR "video conference" videoconferencing OR "video teleconferencing" OR "consultation video" OR videohealth OR video-health OR "video mental health" OR video-mental-health OR "video psychiatry" OR video-psychiatry OR videopsychology OR video-psychology OR videotherapy OR "video recording" OR "video-audio media" OR app* OR application OR "mobile app" OR "mobile application" OR "online app" OR "online application" OR "website application" OR "web app" OR "web application" OR message* OR "text, text message" OR "electronic message" OR "instant message" OR SMS OR Chat OR "online chat" OR "web-based chat" OR "live chat" OR live-chat OR chatter OR Mail OR "electronic mail" OR email* OR e-mail* OR platform* OR "online platform" OR "health platform" OR Net OR internet OR Digital OR "digital therapy" OR electronic OR Device OR "wearable adj1 device" OR wearable-device* OR "portable device" OR portal* OR "web-based portal" OR Bots OR chatbot* OR "chat bot" OR robot* OR robotic* OR sensor* OR biosensor* OR bio-sensor* OR "biosensing technique" OR "bio sensing technique" OR e-referr* OR -referr* OR "e-referr* tool" |
| <b>Youth experiencing homelessness</b>                                                                                                                                                                                                                                                                                                                                                                                                                                                                                                                                                                                                                                                                                                                                                                                                                                                                                                                                                                                                                                                                                                                                                                                                                                                                                                                                                                                                                                                                                                                                                                                                                                                                                                                                                                                                                                                                                                                                                                                                                                                                                                                                                                                                                                                                                                                                                                                                                                                                                                                                                                                                                                                                                                                                                                                                                                                                                                                                                                                                                                                                                                                                                                                                                                                                                                                                                                                                                                                                                                                                                                                                                                                                                                                                                                                                                                                                                                                                                                                                                                                                                                                                                                                                                                                                                       |
| homeless* OR "homeless person" OR "shelter-based" OR "street youth" OR "street adolescen*" OR "homeless adolescen*" OR "homeless young adult" OR "street teen*", "runaway youth" OR "runaway adolescen*" OR "runaway teen*" OR "street living youth" OR "street living adolescen*" OR "street living teen*" OR "youth homelessness" OR "individual* experiencing homelessness" OR "youth experiencing homelessness" OR "young adj1 experiencing homelessness" OR "transition-age".                                                                                                                                                                                                                                                                                                                                                                                                                                                                                                                                                                                                                                                                                                                                                                                                                                                                                                                                                                                                                                                                                                                                                                                                                                                                                                                                                                                                                                                                                                                                                                                                                                                                                                                                                                                                                                                                                                                                                                                                                                                                                                                                                                                                                                                                                                                                                                                                                                                                                                                                                                                                                                                                                                                                                                                                                                                                                                                                                                                                                                                                                                                                                                                                                                                                                                                                                                                                                                                                                                                                                                                                                                                                                                                                                                                                                                           |

a: Mental health disorders include: Psychosis, Depression/ Mood disorder/Stress disorders/Anxiety and panic disorders/ Phobia-related disorders/ Self-harm/ Attention deficit disorders/ Bipolar disorder/ Substance abuse/ Conduct disorders/ Obsession and compulsion disorders/ Trauma-related disorders/ Eating disorders/ Autism/ Pathological gambling / Personality disorders/ Paranoia/ Schizophrenia/ Other mental health

b: ICTs includes: E-mental health/ Tele /Phone/ Mobile/ Computer/ Smart/ Tech/techno/ Online/ Line/ Link/ Web/ Virtual/ Artificial intelligence/ Electronic/ Cyber/ Social media/ Avatar/ Video/ App/ Message/Chat/ Mail/ Platform/ Net/ Digital/ Electronic/ Device/ Portal/ Bots/ Sensor/ E-referral/

**Table S2. Search strategy (French).**

| Mental health (general)                                                                                                                                                                                                                                                                                                                                                                                                                                                                                                                                                                                                                                                                                                                                                                                                                                                                                                                                                                                                                                                                                                                                                                                                                                                                                                                                                                                                                                                                                                                                                                                                                                                                                                                                                                                                                                                                                                                                                                                                                                                                                                                                                                                                                                                                                                                                                                                                                                                                                                                                                                                                                                                                                                                                                                                                                                                                                  |
|----------------------------------------------------------------------------------------------------------------------------------------------------------------------------------------------------------------------------------------------------------------------------------------------------------------------------------------------------------------------------------------------------------------------------------------------------------------------------------------------------------------------------------------------------------------------------------------------------------------------------------------------------------------------------------------------------------------------------------------------------------------------------------------------------------------------------------------------------------------------------------------------------------------------------------------------------------------------------------------------------------------------------------------------------------------------------------------------------------------------------------------------------------------------------------------------------------------------------------------------------------------------------------------------------------------------------------------------------------------------------------------------------------------------------------------------------------------------------------------------------------------------------------------------------------------------------------------------------------------------------------------------------------------------------------------------------------------------------------------------------------------------------------------------------------------------------------------------------------------------------------------------------------------------------------------------------------------------------------------------------------------------------------------------------------------------------------------------------------------------------------------------------------------------------------------------------------------------------------------------------------------------------------------------------------------------------------------------------------------------------------------------------------------------------------------------------------------------------------------------------------------------------------------------------------------------------------------------------------------------------------------------------------------------------------------------------------------------------------------------------------------------------------------------------------------------------------------------------------------------------------------------------------|
| "santé mentale" OR "troub* menta*" OR "maladie mentale" OR "hygiène mentale" OR "déficience* intellectuelle*" OR "perturbation psychologique" OR "problème* de santé mentale" OR psychopathologie* OR "handicap* psychique*" OR "dysfonctionnement* psychologique*" OR "maladie* psychiatrique*" OR "trouble* psychiatrique*" OR "trouble* cognitif*" OR "santé cognitive" OR "double diagnostic" OR "comorbidité* adj2 santé mentale"                                                                                                                                                                                                                                                                                                                                                                                                                                                                                                                                                                                                                                                                                                                                                                                                                                                                                                                                                                                                                                                                                                                                                                                                                                                                                                                                                                                                                                                                                                                                                                                                                                                                                                                                                                                                                                                                                                                                                                                                                                                                                                                                                                                                                                                                                                                                                                                                                                                                   |
| Mental health disorders <sup>a</sup>                                                                                                                                                                                                                                                                                                                                                                                                                                                                                                                                                                                                                                                                                                                                                                                                                                                                                                                                                                                                                                                                                                                                                                                                                                                                                                                                                                                                                                                                                                                                                                                                                                                                                                                                                                                                                                                                                                                                                                                                                                                                                                                                                                                                                                                                                                                                                                                                                                                                                                                                                                                                                                                                                                                                                                                                                                                                     |
| "psychose*" OR "psychotique" OR "trouble* psychotique*" OR "premier épisode psychotique" OR "dépression" OR "symptôme* dépressif*" OR "trouble* de l'humeur" OR "stress" OR "trouble* de stress aigu" OR "trouble* adj1 stress" OR "anxiété" OR "trouble* d'anxiété généralisée" OR "hypervigilance" OR "anxiété sociale" OR "angoisse de séparation" OR "trouble* panique" OR "phobie*" OR "agitation*" OR "phobie*" OR "agoraphobie" OR "trouble* phobique" OR "automutilation" OR "suicid*" OR "comportement* suicidaire*" OR "tentative* de suicide" OR "idée* suicidaires*" OR "pensée* suicidaire*" OR "auto-mutilation*" OR "autodestruction*" OR "trouble* déficitaire de l'attention/hyperactivité" OR "trouble déficitaire de l'attention" OR "trouble bipolaire" OR "maniaco-dépression" OR "état* maniaque*" OR "manie*" OR "trouble* maniaco-dépressif*" OR "dépression bipolaire" OR "abus de substance*" OR "dépendance adj2 substance" OR "consommation de substances" OR "abus de substances chimiques" OR "abus de substances psychoactives" OR "trouble* adj1 à une substance" OR "toxicomanie" OR "toxicomane*" OR "abus de drogues" OR "usage de drogues" OR "dépendance* aux drogues" OR "marijuana" OR "alcoolisme" OR "abus d'alcool" OR "usage d'alcool" OR "dépendance à l'alcool" OR "trouble* lié à l'alcool" OR "trouble* de la conduite" OR "trouble* du comportement" OR "trouble* oppositionnel* adjoint*" OR "trouble* obsessionnel compulsif" OR "TOC" OR "trouble* adj1 post-traumatique*" OR "trouble* post-traumatique*" OR "trouble* liés à un trauma*" OR "violence physique" OR "abus physique" OR "violence sexuelle" OR "abus sexuel" OR "violence émotionnelle" OR "abus émotionnel" OR "trouble* du comportement alimentaire" OR "TCA" OR "anorexie" OR "anorexie mentale" OR "boulimie" OR "boulimie mentale" OR "hyperphagie boulimique*" OR "addiction* à la nourriture" OR "autisme" OR "syndrome d'asperger" OR "trouble* du spectre autistique" OR "jeu de hasard" OR "trouble* du jeu" OR "jeu* compulsif*" OR "trouble dissociatif" OR "trouble* de la personnalité" OR "personnalité* antisociale*" OR "trouble* de la personnalité antisocial*" OR "personnalité limite" OR "trouble de la personnalité limite*" OR "personnalité* compulsive*" OR "personnalité dépendante*" OR "trouble* dépendant*" OR "personnalité histrionique*" OR "histrionique" OR "personnalité passive-agressive*" OR "passif-agressif" OR "paranoïa" OR "trouble* paranoïaque*" OR "schizophrénie" OR "trouble* schizophrénique*" OR "délires" OR "personnalité schizoïde*" OR "personnalité* schizoïde*" OR "trouble* schizoïde*" OR "trouble* schizo-affectif*" OR "trouble* délirant*" OR "trouble réactionnel de l'attachement" OR "apathie" OR "isolement social" OR "faible estime de soi"                                                                       |
| Information and communication technologies (ICTs) <sup>b</sup>                                                                                                                                                                                                                                                                                                                                                                                                                                                                                                                                                                                                                                                                                                                                                                                                                                                                                                                                                                                                                                                                                                                                                                                                                                                                                                                                                                                                                                                                                                                                                                                                                                                                                                                                                                                                                                                                                                                                                                                                                                                                                                                                                                                                                                                                                                                                                                                                                                                                                                                                                                                                                                                                                                                                                                                                                                           |
| "e-santé mentale" OR "santé numérique" OR "gestion de cas électronique*" OR "dossier* médica* électronique*" OR "télésanté" OR "télé-santé" OR "télé-consultation" OR "télé consultation*" OR "télé médecine" OR "télé-médecine" OR "télé-médecine" OR "télé santé mentale" OR "télé-santé mentale" OR "télé psychiatrie" OR "télé-psychiatrie" OR "télépsychiatrie" OR "télé psychologie" OR "télépsychologie" OR "télé thérapie" OR "télé thérapie*" OR "téléthérapie*" OR "téléphone*" OR "consultation* téléphonique*" OR "cellulaire*" OR "téléphone* mobile*" OR "appareil* mobile*" OR "santé mobile" OR "msanté" OR "m-santé" OR "m-Santé" OR "ordinateur*" OR "ordinateur* portable*" OR "ordinateur-portable" OR "portable*" OR "téléphone* intelligent*" OR "montre* intelligente*" OR "tech*" OR "technologie*" OR "technologie* mobile*" OR "technologie* de l'information et de la communication" OR "technologie adj2 santé" OR "en ligne" OR "santé en ligne" OR "information*" en ligne" OR "thérapie cognitivo-comportementale en ligne" OR "soutien en ligne" OR "formation* en ligne" OR "programme* en ligne" OR "ressource* en ligne" OR "ressouce* en ligne" OR "psychothérapeute* en ligne" OR "plateforme* en ligne" OR "soutien en ligne" OR "échange* en ligne" OR "traitement* en ligne" OR "outil* en ligne" OR "module* en ligne" OR "prévention en ligne" OR "application* en ligne" OR "expérience* en ligne" OR "ligne*" OR "ligne* téléphonique*" OR "ligne* de détresse" OR "ligne* de crise" OR "ligne* d'aide" OR "lien*" OR "lien* électronique*" OR "lien* de santé" OR "Web" OR "site-web" OR "site* web" OR "site* internet" OR "réalité virtuelle" OR "RV" OR "intelligence artificielle" OR "Électronique" OR "santé mentale électronique" OR "patient électronique" OR "Cyber" OR "cyber psychologie" OR "cyberpsychologie" OR "cyber-psychologie" OR "cybersanté mentale" OR "cyber-espace" OR "cyber espace" OR "médias sociaux" OR "réseaux sociaux" OR "facebook" OR "avatar*" OR "vidéo santé" OR "vidéo-santé" OR "vidéo santé mentale" OR "vidéo psychiatrie" OR "vidéo-psychiatrie" OR "vidéopsychiatrie" OR "vidéo psychologie" OR "vidéo-psychologie, vidéopsychologie" OR "vidéothérapie" OR "vidéo thérapie" OR "vidéo-thérapie" OR "appli*" OR "application*" OR "application* en ligne" OR "messag*" OR "messagerie instantanée" OR "message* texte*" OR "texto*" OR "SMS" OR "Chat" OR "chat en ligne" OR "chat en direct" dialogue*" OR "agent conversationnel" OR "clavardage" OR "clavardage en ligne" OR "courriel*" OR "courrier électronique" OR "email*" OR "e-mail*" OR "Plateforme" OR "plate-forme" OR "Net" OR "internet" OR "toile" OR "Digital" OR "Electronique" OR "appareil*" OR "appareil* portable*" OR "portable*" OR "appareil* portatif*" OR "portail*" OR "Bots" OR "robot*" OR "senseur*" OR "référence* électronique" |
| Youth experiencing homelessness                                                                                                                                                                                                                                                                                                                                                                                                                                                                                                                                                                                                                                                                                                                                                                                                                                                                                                                                                                                                                                                                                                                                                                                                                                                                                                                                                                                                                                                                                                                                                                                                                                                                                                                                                                                                                                                                                                                                                                                                                                                                                                                                                                                                                                                                                                                                                                                                                                                                                                                                                                                                                                                                                                                                                                                                                                                                          |
| itinérance OR itinérant* OR sans-abri* OR sans abri* OR "sans domicile" OR "sans domicile fixe" OR "jeune* de la rue" OR "jeune* adj1 sans abri" OR "jeune* itinérant*" OR "fugueur*" OR "adolescent* itinérant*" OR "vivant* dans la rue" OR "âge de transition"                                                                                                                                                                                                                                                                                                                                                                                                                                                                                                                                                                                                                                                                                                                                                                                                                                                                                                                                                                                                                                                                                                                                                                                                                                                                                                                                                                                                                                                                                                                                                                                                                                                                                                                                                                                                                                                                                                                                                                                                                                                                                                                                                                                                                                                                                                                                                                                                                                                                                                                                                                                                                                        |

a: Mental health disorders include: Psychosis, Depression/ Mood disorder/Stress disorders/Anxiety and panic disorders/ Phobia-related disorders/ Self-harm/ Attention deficit disorders/ Bipolar disorder/ Substance abuse/ Conduct disorders/ Obsession and compulsion disorders/ Trauma-related disorders/ Eating disorders/ Autism/ Pathological gambling / Personality disorders/ Paranoia/ Schizophrenia/ Other mental health

b: ICTs includes: E-mental health/ Tele /Phone/ Mobile/ Computer/ Smart/ Tech/techno/ Online/ Line/ Link/ Web/ Virtual/ Artificial intelligence/ Electronic/ Cyber/ Social media/ Avatar/ Video/ App/ Message/Chat/ Mail/ Platform/ Net/ Digital/ Electronic/ Device/ Portal/ Bots/ Sensor/ E-referral
